# Supplementary material for: Prediction of South American Leaf Blight and Disease-Induced Photosynthetic Changes in Rubber Tree, Using Machine Learning Techniques on Leaf Hyperspectral Reflectance
Source: MDPI journal article supplement (doi:10.3390/plants11030329), 2022-01-26
Supplement: s1 [file s1]

- **Supplementary Materials**

# **Prediction of South American Leaf Blight and Disease-Induced Photosynthetic Changes in Rubber Tree, Using Machine Learning Techniques on Leaf Hyperspectral Reflectance**

**Armando Sterling <sup>1,2\*</sup>, Julio A. Di Rienzo <sup>2</sup>**

<sup>1</sup> Phytopathology Laboratory, Instituto Amazónico de Investigaciones Científicas SINCHI – Mycology Research Group GINMUA, Programa de Biología, Facultad de Ciencias Básicas, Universidad de la Amazonía, Florencia, 180001, Colombia

<sup>2</sup> InfoStat Transfer Center, Facultad de Ciencias Agropecuarias, Universidad Nacional de Córdoba, 5016, Córdoba, Argentina; [dirienzo@agro.unc.edu.ar](mailto:dirienzo@agro.unc.edu.ar) (J.A.D.R.)

\* Correspondence: [asterling@sinchi.org.co](mailto:asterling@sinchi.org.co) (A.S.); Tel.: +57-310-786-2496

## Supplementary Tables

**Table S1.** Models features and parameter tuning for five machine learning algorithms

| Algorithm | Train model <sup>a</sup> | Tuning parameters                                                                                                                                                        | Predicted variable | Model' final hyperparameters                                    |
|-----------|--------------------------|--------------------------------------------------------------------------------------------------------------------------------------------------------------------------|--------------------|-----------------------------------------------------------------|
| RF        | rf                       | (i) 10-fold CV 5 times; (ii) number of randomly selected predictors (mtry) = seq(2, 20, by =2); (iii) number of trees =1000; (iv) tuneLength = 10; (v) importance = TRUE | Severity class     | mtry = 8                                                        |
|           |                          |                                                                                                                                                                          | <i>A</i>           | mtry = 20                                                       |
|           |                          |                                                                                                                                                                          | <i>E</i>           | mtry = 20                                                       |
|           |                          |                                                                                                                                                                          | <i>gs</i>          | mtry = 10                                                       |
|           |                          |                                                                                                                                                                          | <i>WUEe</i>        | mtry = 10                                                       |
|           |                          |                                                                                                                                                                          | <i>Fv/Fm</i>       | mtry = 4                                                        |
|           |                          |                                                                                                                                                                          | <i>Fv'/Fm'</i>     | mtry = 2                                                        |
|           |                          |                                                                                                                                                                          | NPQ                | mtry = 18                                                       |
|           |                          |                                                                                                                                                                          | ETR                | mtry = 20                                                       |
|           |                          |                                                                                                                                                                          | <i>qP</i>          | mtry = 10                                                       |
| BRT       | gbm                      | (i) 10-fold CV 5 times; (ii) max tree depth (1, 3, 5 and 7); (iii) number of trees (100 to 1000, by 50); (iv) minimal terminal node size (10); shrinkage (0.01 and 0.1)  | Severity class     | number of trees = 100;<br>shrinkage = 0.1; max tree depth = 1   |
|           |                          |                                                                                                                                                                          | <i>A</i>           | number of trees = 1000;<br>shrinkage = 0.1; max tree depth = 5  |
|           |                          |                                                                                                                                                                          | <i>E</i>           | number of trees = 850;<br>shrinkage = 0.1; max tree depth = 1   |
|           |                          |                                                                                                                                                                          | <i>gs</i>          | number of trees = 450;<br>shrinkage = 0.1; max tree depth = 7   |
|           |                          |                                                                                                                                                                          | <i>WUEe</i>        | number of trees = 950;<br>shrinkage = 0.1; max tree depth = 7   |
|           |                          |                                                                                                                                                                          | <i>Fv/Fm</i>       | number of trees = 1000;<br>shrinkage = 0.01; max tree depth = 1 |
|           |                          |                                                                                                                                                                          | <i>Fv'/Fm'</i>     | number of trees = 300;<br>shrinkage = 0.1; max tree depth = 5   |
|           |                          |                                                                                                                                                                          | NPQ                | number of trees = 1000;<br>shrinkage = 0.1; max tree depth = 1  |

|       |           |                                                                                                                                                                                                    |                |                                                                   |
|-------|-----------|----------------------------------------------------------------------------------------------------------------------------------------------------------------------------------------------------|----------------|-------------------------------------------------------------------|
| BCART | treebag   | (i) 10-fold CV 5 times; (ii) No other tuning parameters for this model                                                                                                                             | ETR            | number of trees = 950;<br>shrinkage = 0.1; max tree<br>depth = 7  |
|       |           |                                                                                                                                                                                                    | $qP$           | number of trees = 700;<br>shrinkage = 0.01; max tree<br>depth = 7 |
|       |           |                                                                                                                                                                                                    | Severity class | -                                                                 |
|       |           |                                                                                                                                                                                                    | <i>A</i>       | -                                                                 |
|       |           |                                                                                                                                                                                                    | <i>E</i>       | -                                                                 |
|       |           |                                                                                                                                                                                                    | $g_s$          | -                                                                 |
|       |           |                                                                                                                                                                                                    | $WUE_e$        | -                                                                 |
|       |           |                                                                                                                                                                                                    | $F_v/F_m$      | -                                                                 |
|       |           |                                                                                                                                                                                                    | $F_v'/F_m'$    | -                                                                 |
|       |           |                                                                                                                                                                                                    | NPQ            | -                                                                 |
| ANN   | nnet      | (i) 10-fold CV 5 times; (ii) size (1 to 9, by 2); (iii) decay (0.001, 0.01 and 0.1); (iv) preprocessing (center and scale); (v) maxit (1000); (vi) linout = TRUE; (vii) trace = FALSE              | ETR            | -                                                                 |
|       |           |                                                                                                                                                                                                    | $qP$           | -                                                                 |
|       |           |                                                                                                                                                                                                    | Severity class | size = 5; decay = 0.001                                           |
|       |           |                                                                                                                                                                                                    | <i>A</i>       | size = 3; decay = 0.01                                            |
|       |           |                                                                                                                                                                                                    | <i>E</i>       | size = 9; decay = 0.1                                             |
|       |           |                                                                                                                                                                                                    | $g_s$          | size = 7; decay = 0.01                                            |
|       |           |                                                                                                                                                                                                    | $WUE_e$        | size = 3; decay = 0.1                                             |
|       |           |                                                                                                                                                                                                    | $F_v/F_m$      | size = 7; decay = 0.001                                           |
|       |           |                                                                                                                                                                                                    | $F_v'/F_m'$    | size = 7; decay = 0.01                                            |
|       |           |                                                                                                                                                                                                    | NPQ            | size = 3; decay = 0.001                                           |
| SVM   | svmRadial | (i) 10-fold CV 5 times; (ii) sigma by default (i.e., sigma was held constant at a value of 0.1792956); (iii) cost (C) (2 to 500, by 2); (iv) tuneLength (15); (v) preprocessing (center and scale) | ETR            | size = 1; decay = 0.1                                             |
|       |           |                                                                                                                                                                                                    | $qP$           | size = 3; decay = 0.1                                             |
|       |           |                                                                                                                                                                                                    | Severity class | C = 8                                                             |
|       |           |                                                                                                                                                                                                    | <i>A</i>       | C = 32                                                            |
|       |           |                                                                                                                                                                                                    | <i>E</i>       | C = 2                                                             |
|       |           |                                                                                                                                                                                                    | $g_s$          | C = 4                                                             |
|       |           |                                                                                                                                                                                                    | $WUE_e$        | C = 32                                                            |
|       |           |                                                                                                                                                                                                    | $F_v/F_m$      | C = 2                                                             |
|       |           |                                                                                                                                                                                                    | $F_v'/F_m'$    | C = 2                                                             |
|       |           |                                                                                                                                                                                                    | NPQ            | C = 4                                                             |
|       |           |                                                                                                                                                                                                    | ETR            | C = 256                                                           |
|       |           |                                                                                                                                                                                                    | $qP$           | C = 4                                                             |

<sup>a</sup>Train model from R Package caret

- No apply

Random Forest (RF), Boosted Regression Tree (BRT), Bagged Classification and Regression Tree (BCART), Artificial Neural Network (ANN), Support Vector Machine (SVM), Net CO<sub>2</sub> assimilation rate (*A*) (μmol CO<sub>2</sub> m<sup>-2</sup> s<sup>-1</sup>), transpiration rate (*E*) (mmol H<sub>2</sub>O m<sup>-2</sup> s<sup>-1</sup>), stomatal conductance to water vapor ( $g_s$ ) (mol H<sub>2</sub>O m<sup>-2</sup> s<sup>-1</sup>), water use efficiency extrinsic ( $WUE_e$ ) (μmol CO<sub>2</sub> mmol H<sub>2</sub>O<sup>-1</sup>), maximum quantum yield of photosystem II (PSII) ( $F_v/F_m$ ), efficiency of excitation energy capture by open PSII reaction centers ( $F_v'/F_m'$ ), non-photochemical quenching coefficient (NPQ), electron transport rate (ETR), and photochemical quenching coefficient ( $qP$ ).

Supplementary Figures

(a)

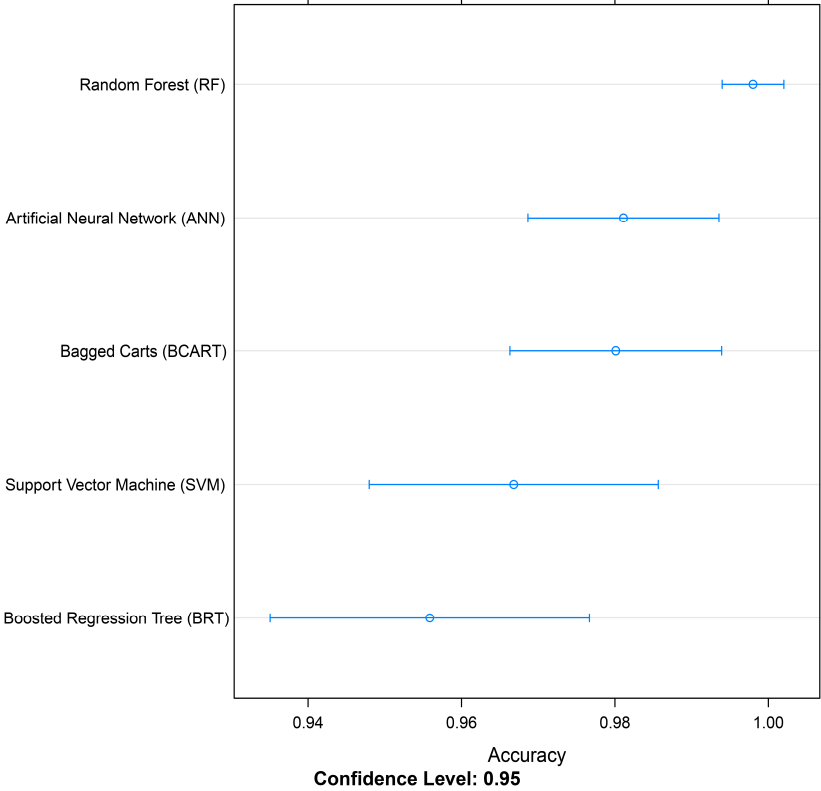

(b)

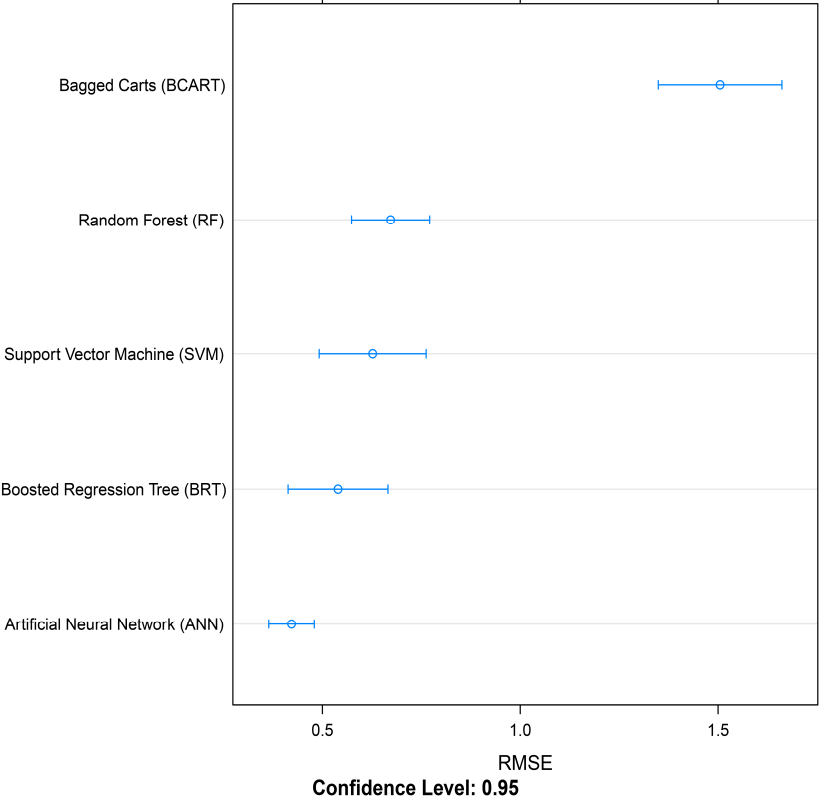

(c)

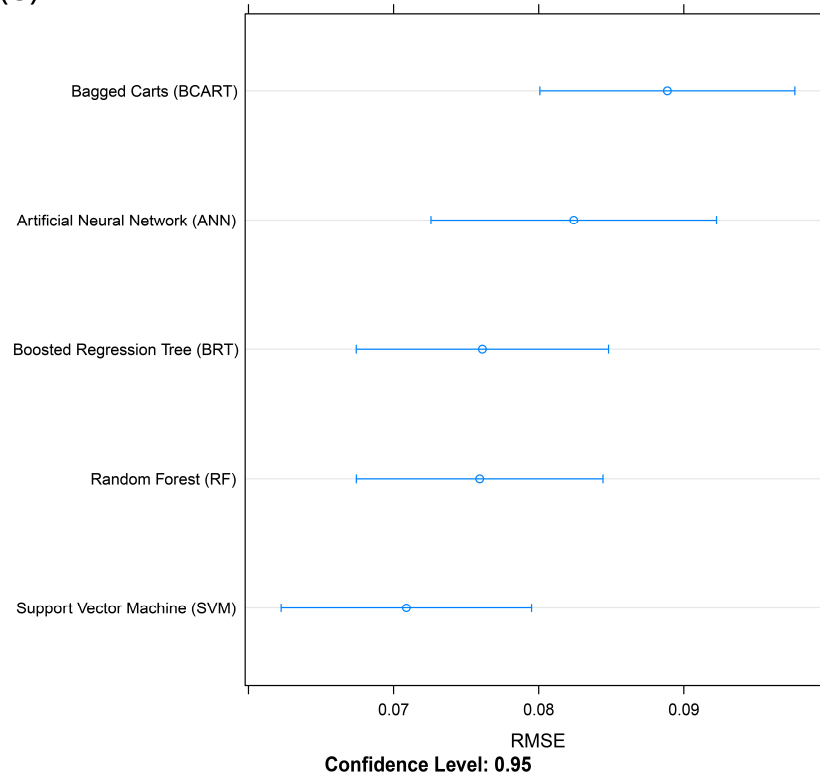

(d)

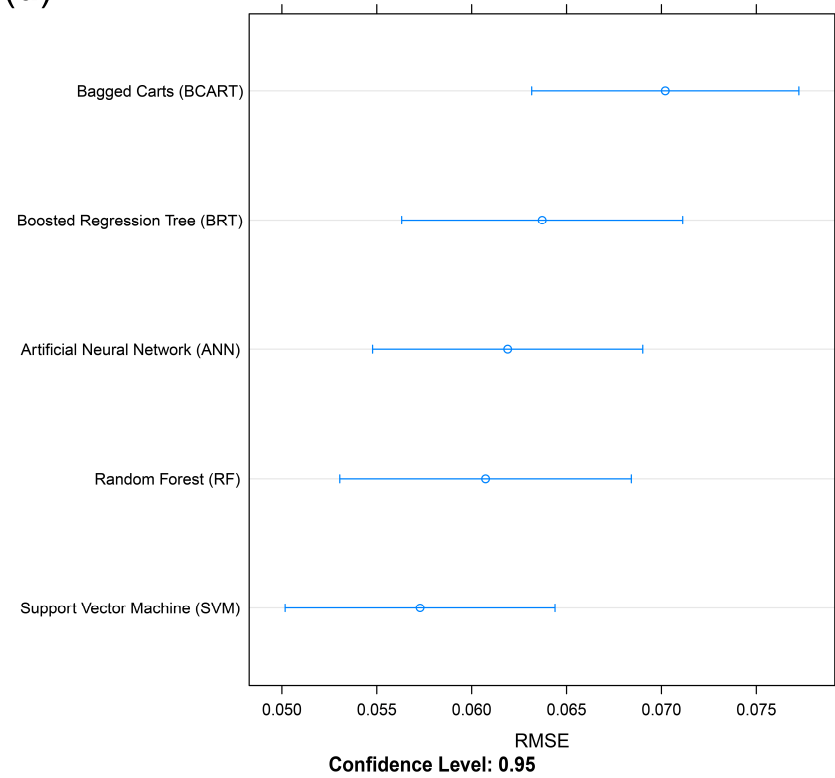

(e)

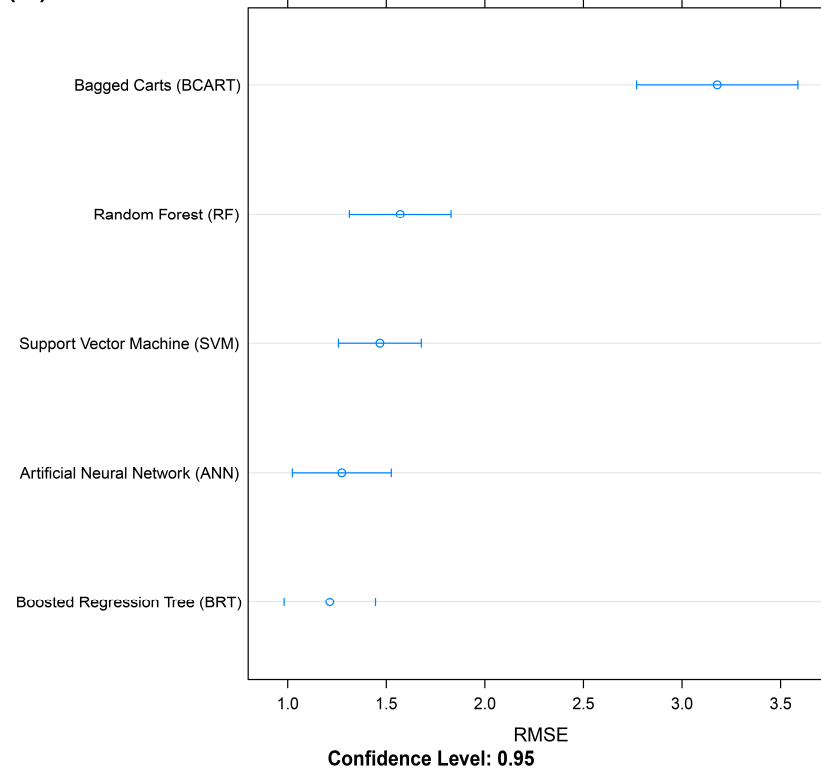

(f)

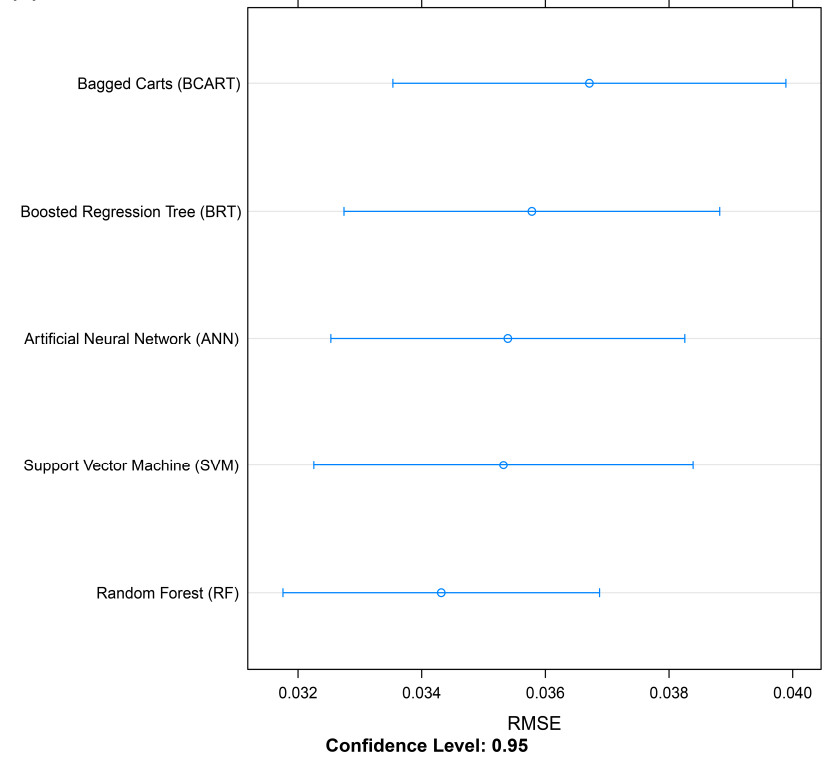

(g)

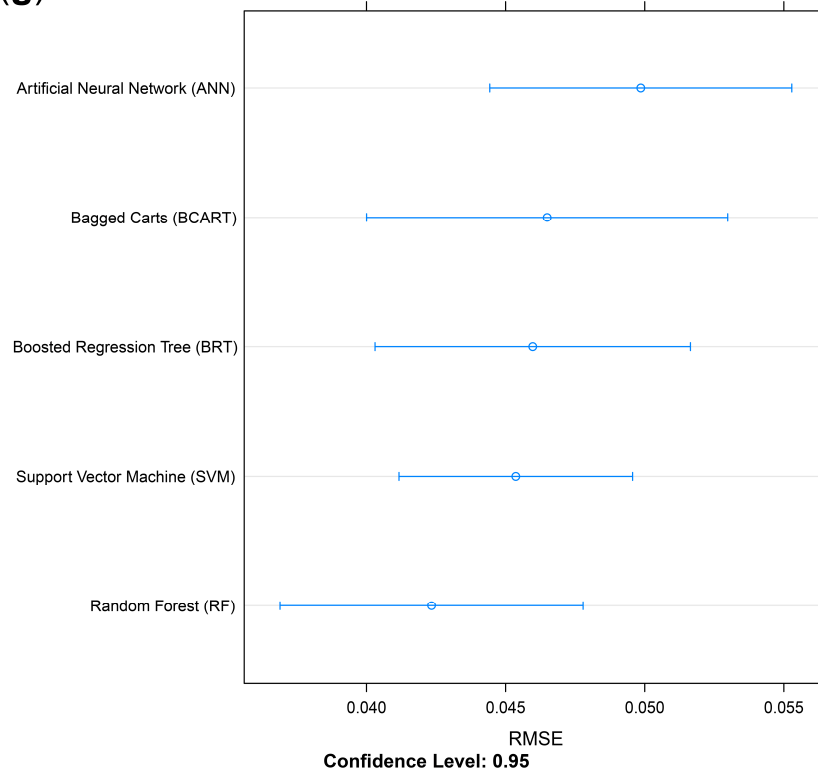

(h)

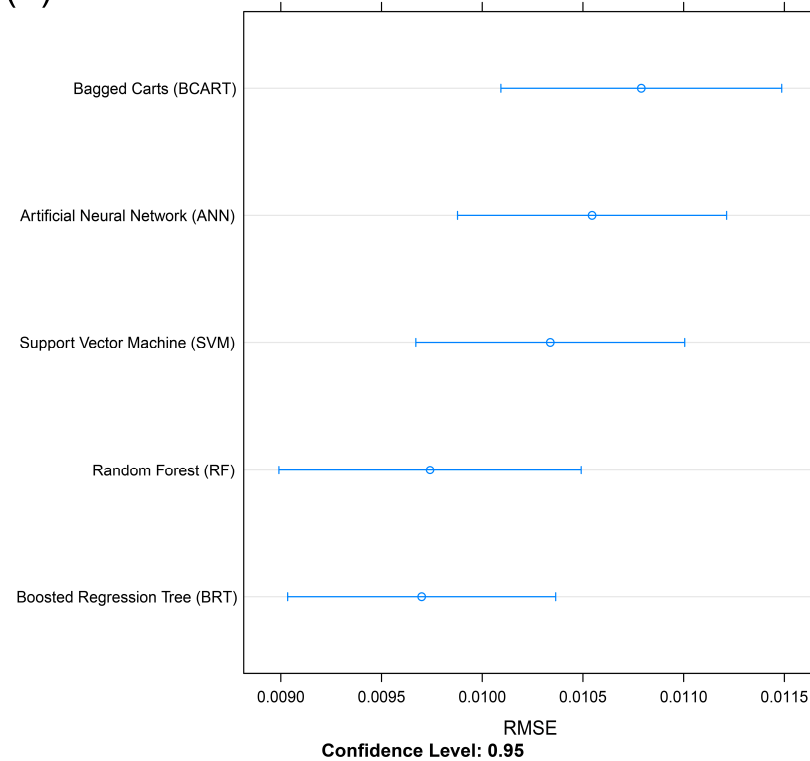

**(i)**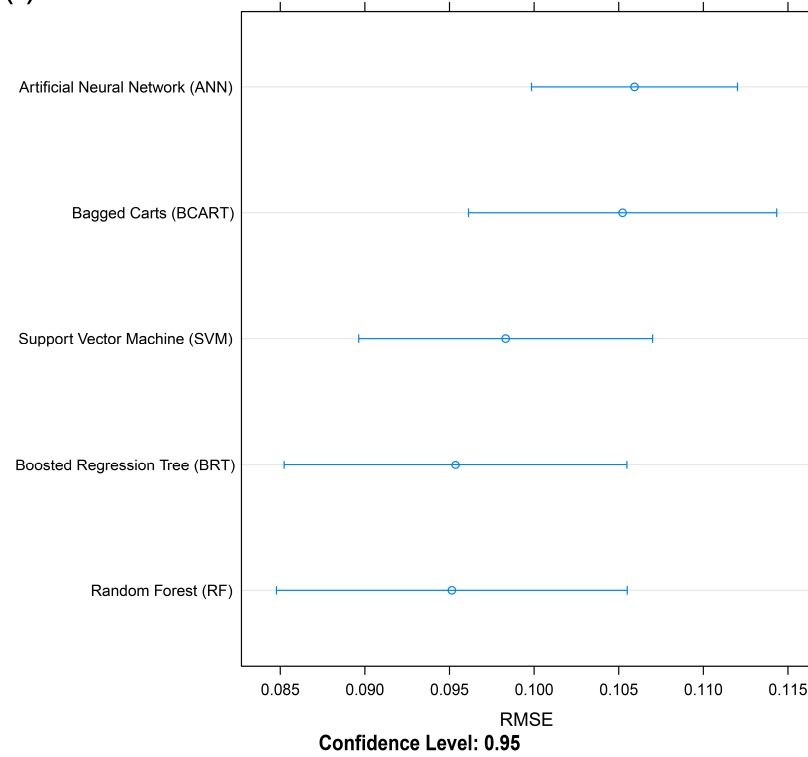**(j)**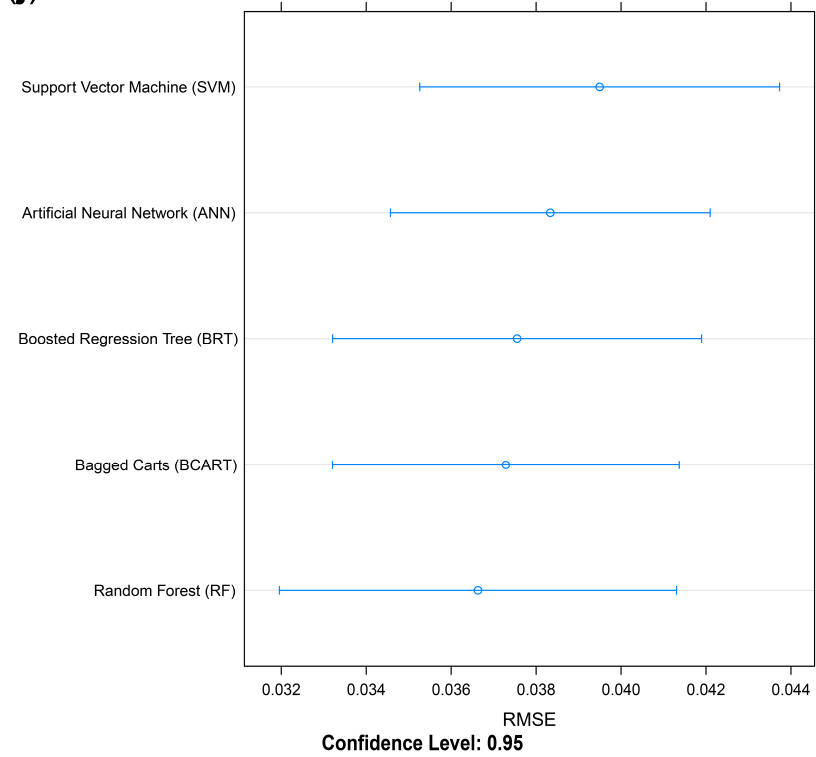

**Figure S1.** Dot plots for the Accuracy (classification) and RMSE (numerical prediction) metrics using the 10-fold cross-validation repeated 5 times method for five machine learning models. Each line represents the mean and 95% confidence interval. **(a)** Severity class, **(b)** net CO<sub>2</sub> assimilation rate ( $A$ ) ( $\mu\text{mol CO}_2 \text{ m}^{-2} \text{ s}^{-1}$ ), **(c)** transpiration rate ( $E$ ) ( $\text{mmol H}_2\text{O m}^{-2} \text{ s}^{-1}$ ), **(d)** stomatal conductance to water vapor ( $g_s$ ) ( $\text{mol H}_2\text{O m}^{-2} \text{ s}^{-1}$ ), **(e)** water use efficiency extrinsic ( $WUE_s$ ), **(f)** maximum quantum yield of photosystem II (PSII) ( $F_v/F_m$ ), **(g)** efficiency of excitation energy capture by open PSII reaction centers ( $F_v'/F_m'$ ), **(h)** non-photochemical quenching coefficient (NPQ), **(i)** electron transport rate (ETR), and **(j)** photochemical quenching coefficient ( $qP$ )



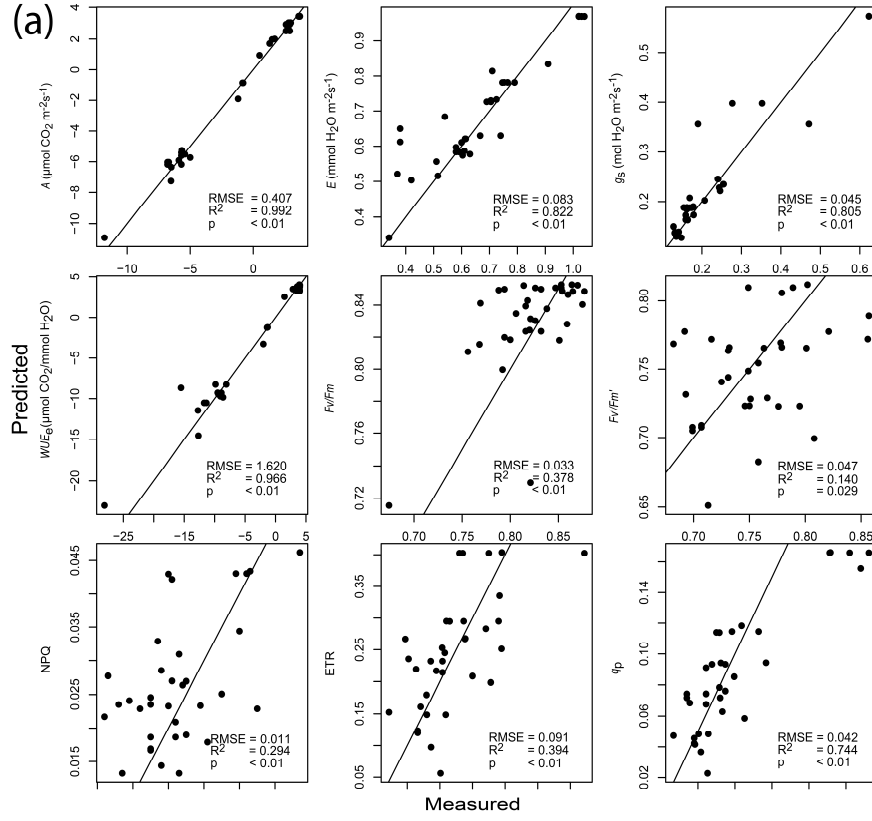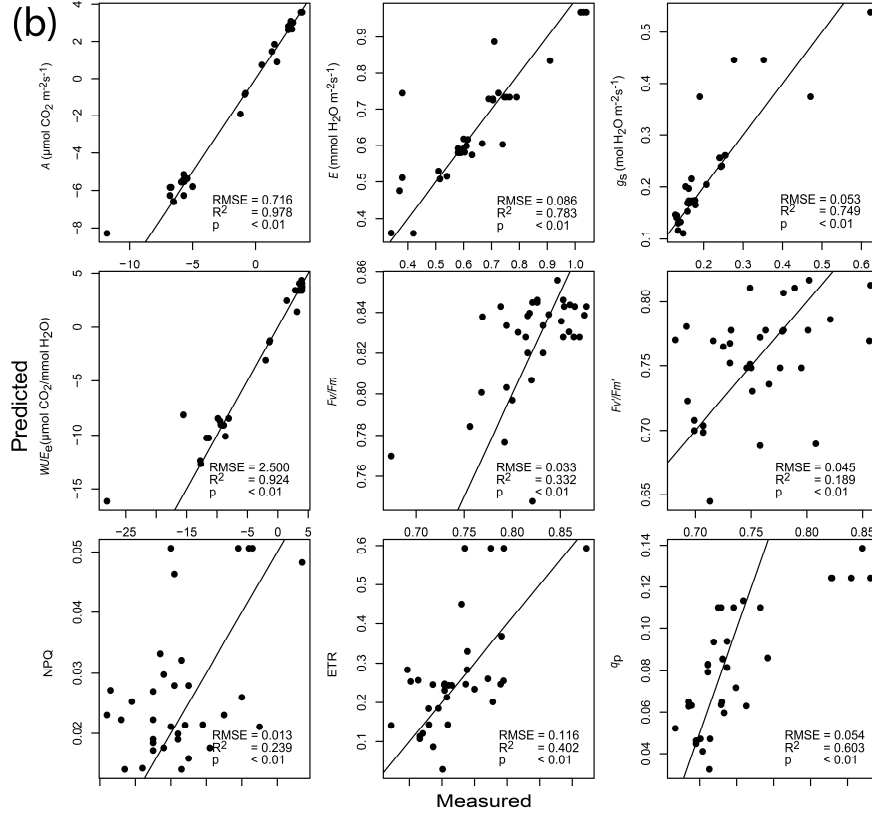

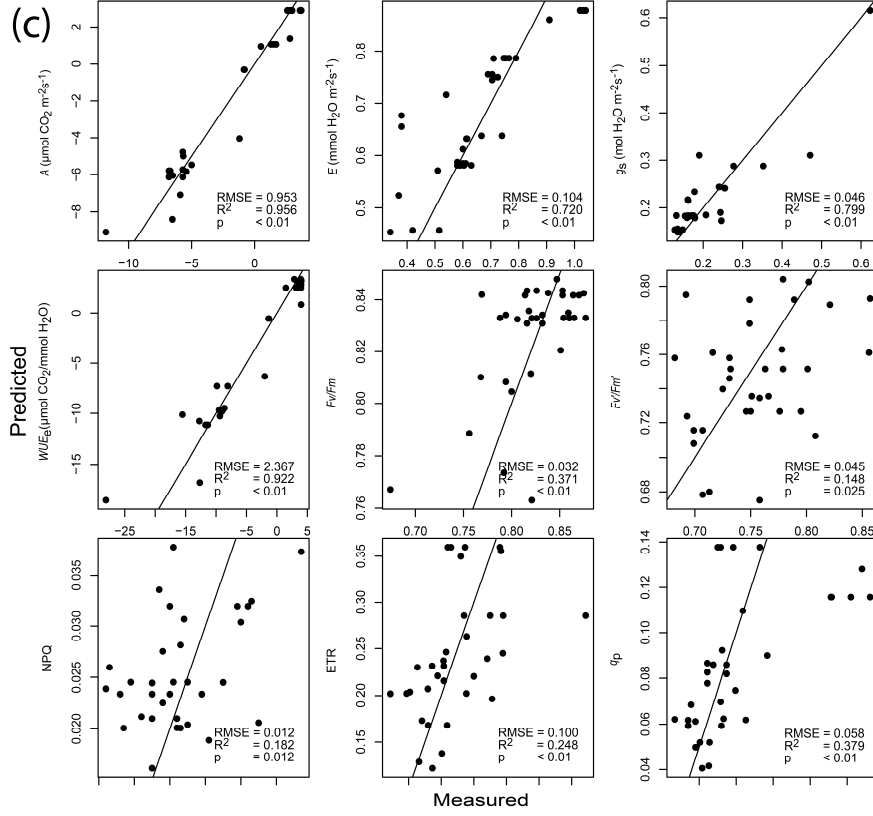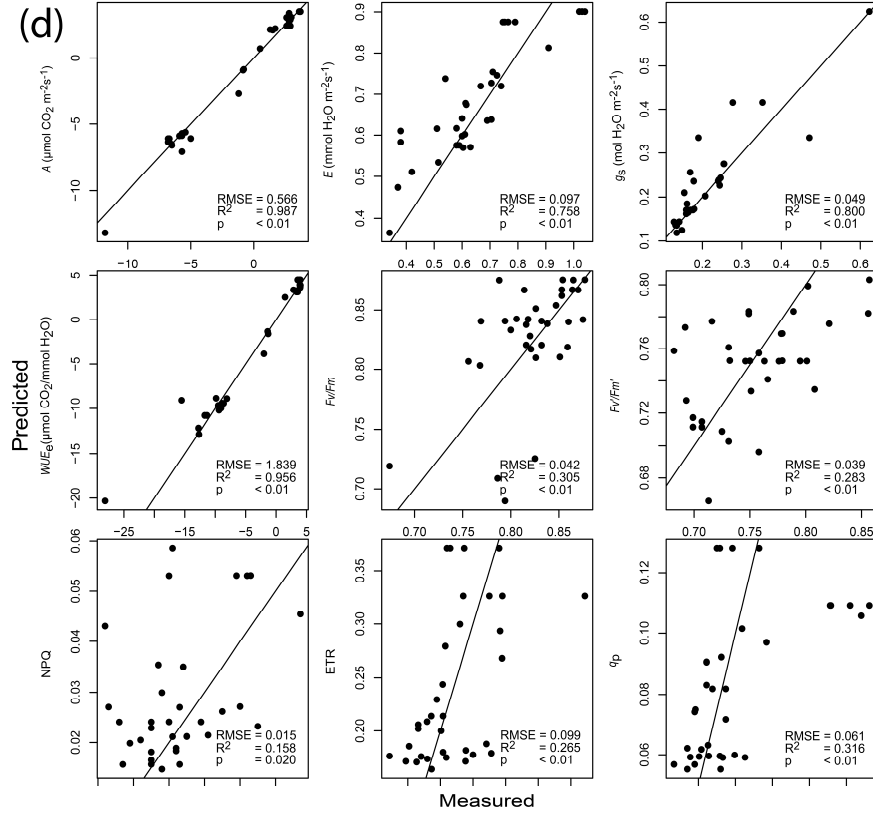

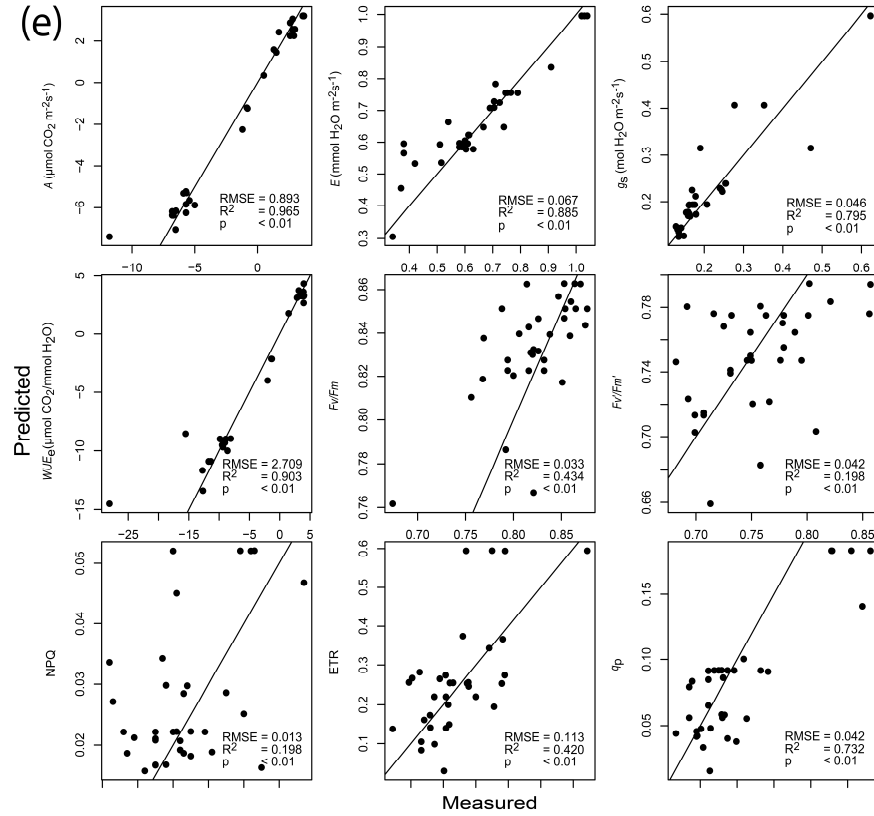

**Figure S2.** Predicted vs. measured values plots of the testing datasets results for five machine learning models used to predict nine photosynthetic traits: net  $\text{CO}_2$  assimilation rate ( $A$ ) ( $\mu\text{mol CO}_2 \text{ m}^{-2} \text{ s}^{-1}$ ), transpiration rate ( $E$ ) ( $\text{mmol H}_2\text{O m}^{-2} \text{ s}^{-1}$ ), stomatal conductance to water vapor ( $g_s$ ) ( $\text{mol H}_2\text{O m}^{-2} \text{ s}^{-1}$ ), water use efficiency extrinsic ( $WUE_e$ ) ( $\mu\text{mol CO}_2 \text{ mmol H}_2\text{O}^{-1}$ ), maximum quantum yield of photosystem II (PSII) ( $F_v/F_m$ ), efficiency of excitation energy capture by open PSII reaction centers ( $F_v'/F_m'$ ), non-photochemical quenching coefficient (NPQ), electron transport rate (ETR), and photochemical quenching coefficient ( $q_p$ ). (a) Random Forest (RF), (b) Boosted Regression Tree (BRT), (c) Bagged Classification and Regression Tree (BCART), (d) Artificial Neural Network (ANN), and (e) Support Vector Machine (SVM)
